# Supplementary material for: Enhanced performance of perovskite solar cells by modulating the Lewis acid–base reaction
Source: Royal Society of Chemistry journal article supplement (doi:10.1039/c6nr07450b), 2016-01-01
Supplement: c6nr07450b1.pdf [file c6nr07450b1.pdf]

## Supporting Information

# Enhanced performance of perovskite solar cells by modulating Lewis acid-base reaction

*Xiaobing Cao,<sup>1</sup> Changli Li,<sup>1</sup> Yahui Li,<sup>1</sup> Fei Fang,<sup>1, 2</sup> Xian Cui,<sup>1</sup> Youwei Yao,<sup>2</sup> Jinquan Wei<sup>1\*</sup>*

*1. Key Lab for Advanced Materials Processing Technology of Education Ministry; State Key Lab of New Ceramic and Fine Processing; School of Materials Science and Engineering, Tsinghua University, Beijing 100084, P.R. China*

*2. Institute of Advanced Materials, Graduate School at Shenzhen, Tsinghua University, Shenzhen 518055, P.R. China*

\*E-mail: [jqwei@tsinghua.edu.cn](mailto:jqwei@tsinghua.edu.cn)

This supporting information includes figures from S1 to S3.

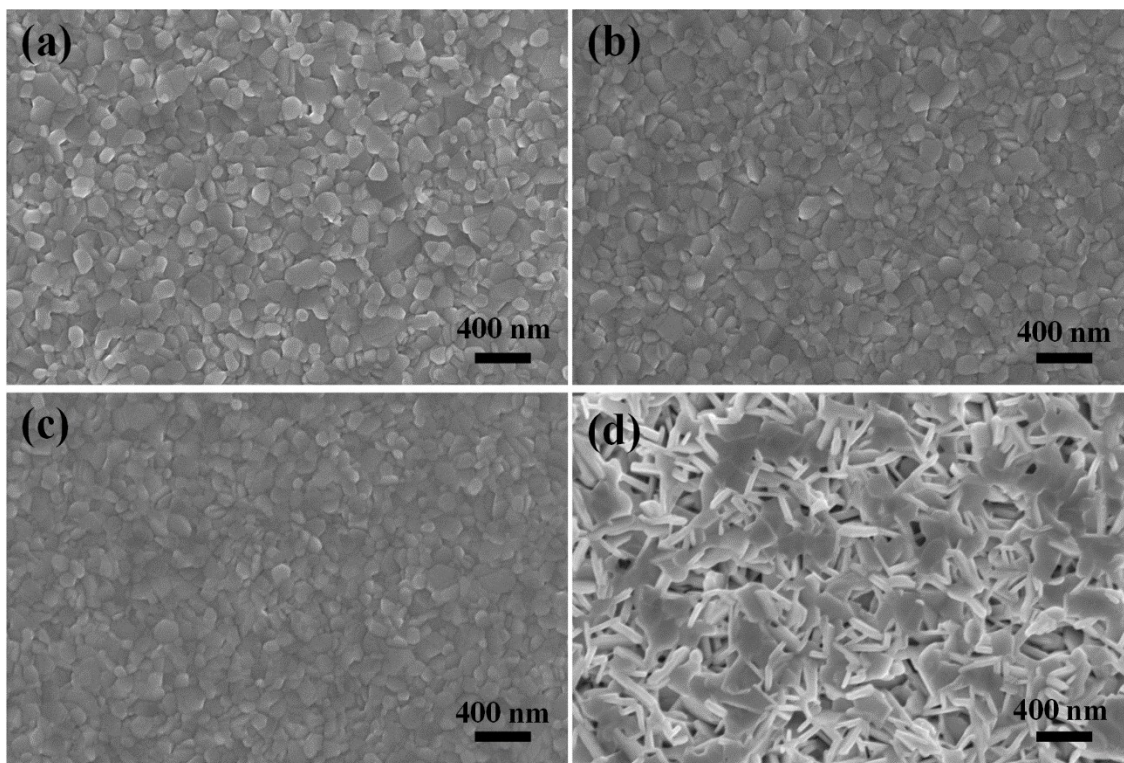

**Figure S1.** SEM images of the PbI<sub>2</sub> films fabricated from different concentrations of NMP. The films were annealed at 100 °C for 30 min. (a) 2%, (b) 4%, (c) 8%, (d) 30%.

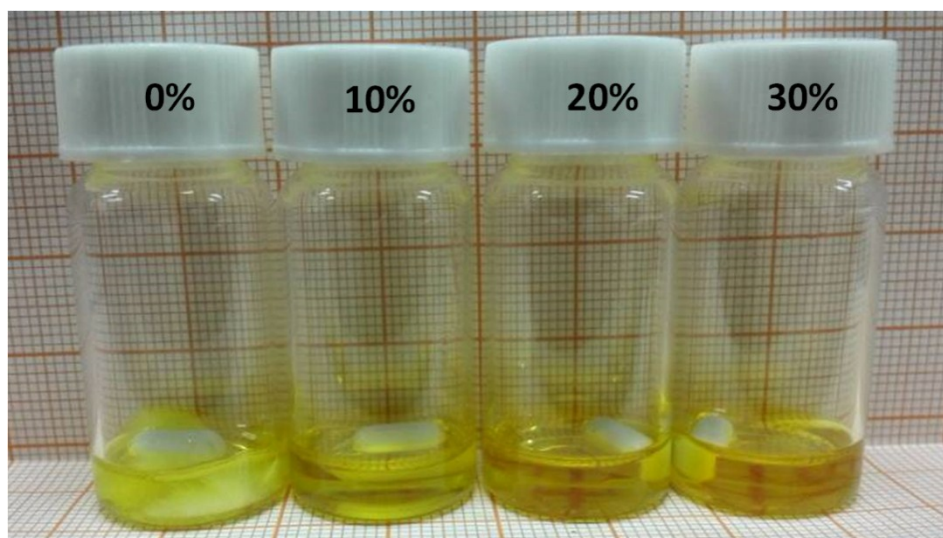

**Figure S2.** Photographs of PbI<sub>2</sub>/DMF solutions with different concentrations of NMP.

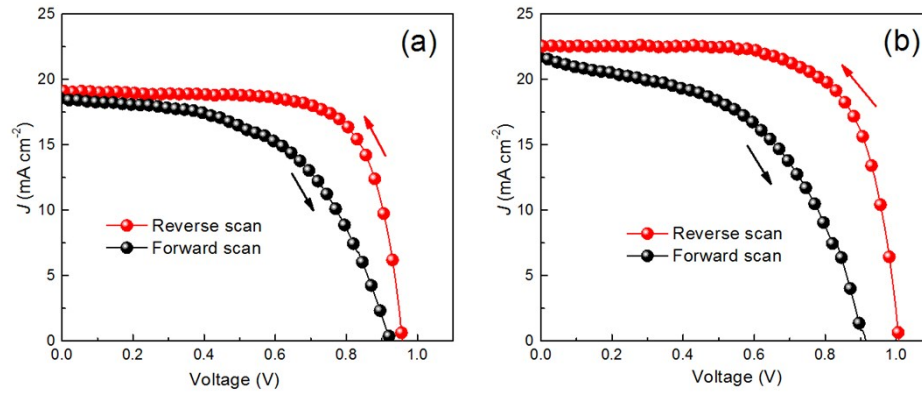

**Figure S3.** Light  $J$ - $V$  curves obtained from reverse and forward scans of the PSCs fabricated from  $\text{PbI}_2/\text{DMF}$  solutions adding with different concentrations of NMP. (a)0%, (b)10%.
